# Supplementary material
Source: Springer Nature journal article supplement (https://www.springermedizin.de/resource/supplementary/12887_2006_149_MOESM1_ESM.pdf/9477368)
Supplement: MOESM1 [file 9477368]

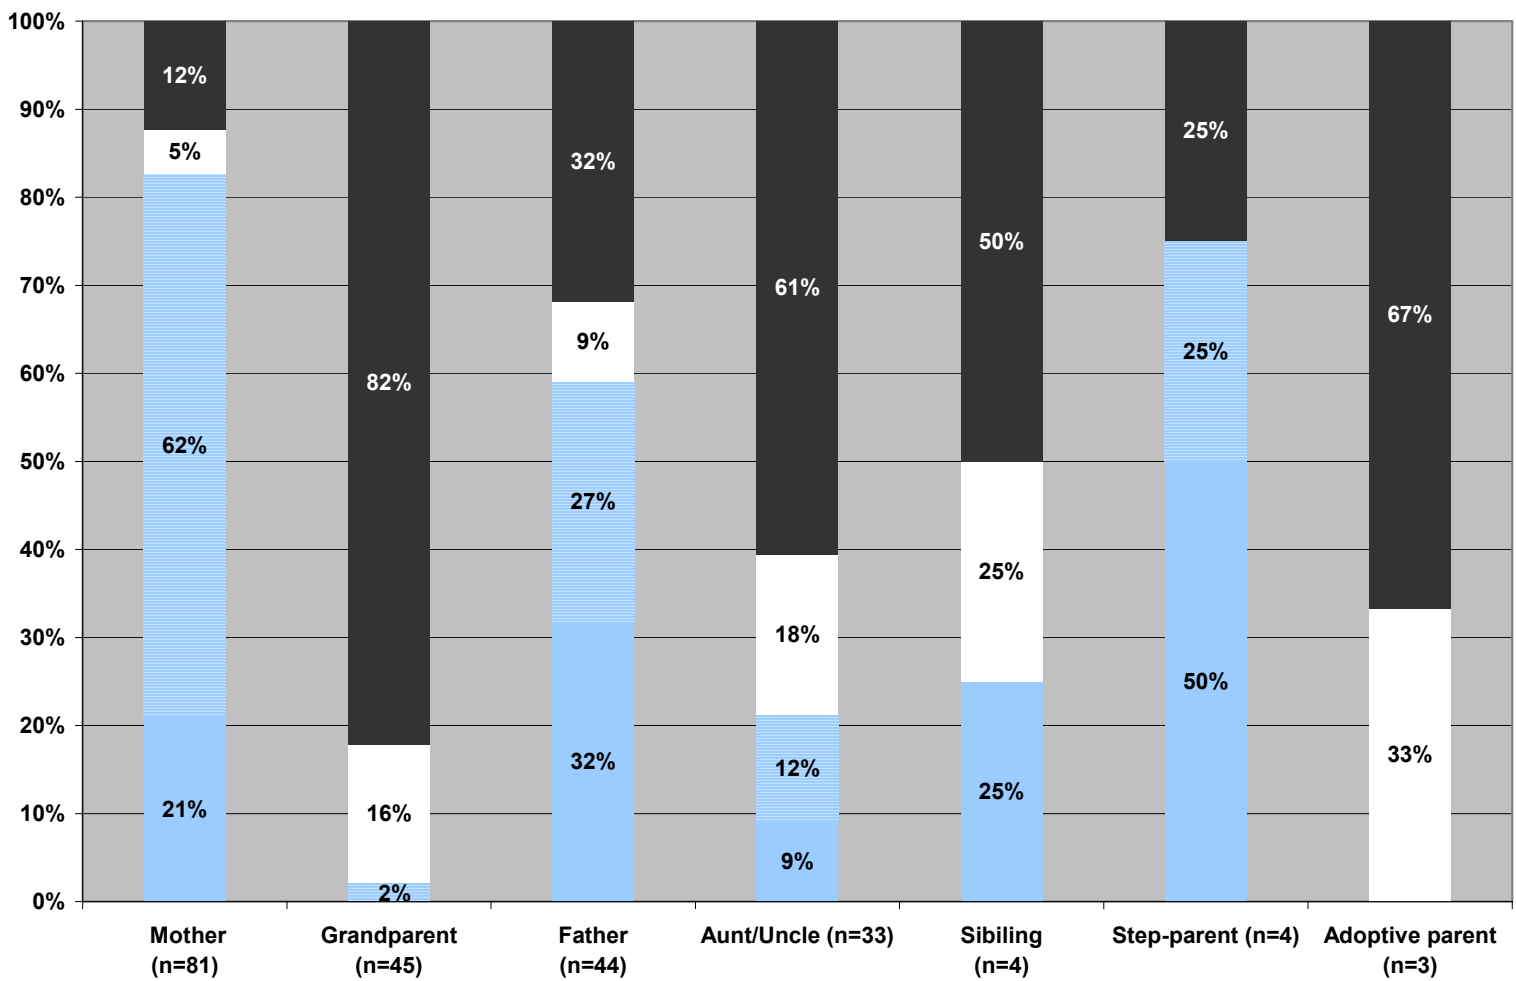

- HIV+, not in care at Sinikithemba Clinic
- HIV+, in care at Sinikithemba Clinic
- HIV-
- HIV status unknown/untested
